# Supplementary material for: De novo learning versus adaptation of continuous control in a manual tracking task
Source: eLife journal article supplement (doi:10.7554/elife.62578), 2021-06-25
Supplement: supp [file elife-62578-supp-v1.zip]

Archive with 10 entries (10 files):
- elife_poa_e62578_Figure_4_figure_supplement_1.pdf
- elife_poa_e62578_Figure_4_figure_supplement_2.pdf
- elife_poa_e62578_Figure_5_figure_supplement_1.pdf
- elife_poa_e62578_Figure_5_figure_supplement_2.pdf
- elife_poa_e62578_Figure_6_figure_supplement_1.pdf
- elife_poa_e62578_Figure_2_video_1.avi
- elife_poa_e62578_Transparent_Reporting_File.pdf
- elife_poa_e62578_Figure_3_source_data_1.xlsx
- elife_poa_e62578_Figure_5_source_data_1.xlsx
- elife_poa_e62578_Figure_6_source_data_1.xlsx
