# Supplementary figures and images for: De novo learning versus adaptation of continuous control in a manual tracking task
Source: eLife journal article supplement (doi:10.7554/elife.62578), 2021-06-25

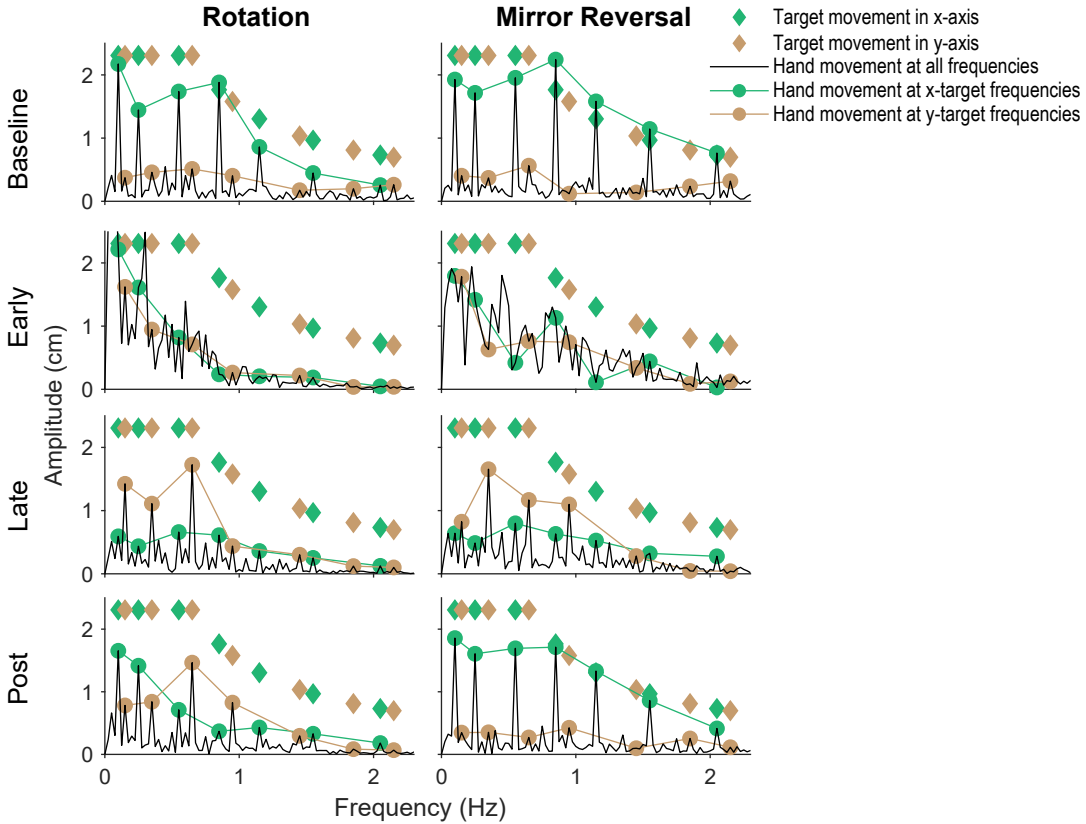

Supplement: supp [file elife-62578-supp-v1.zip]

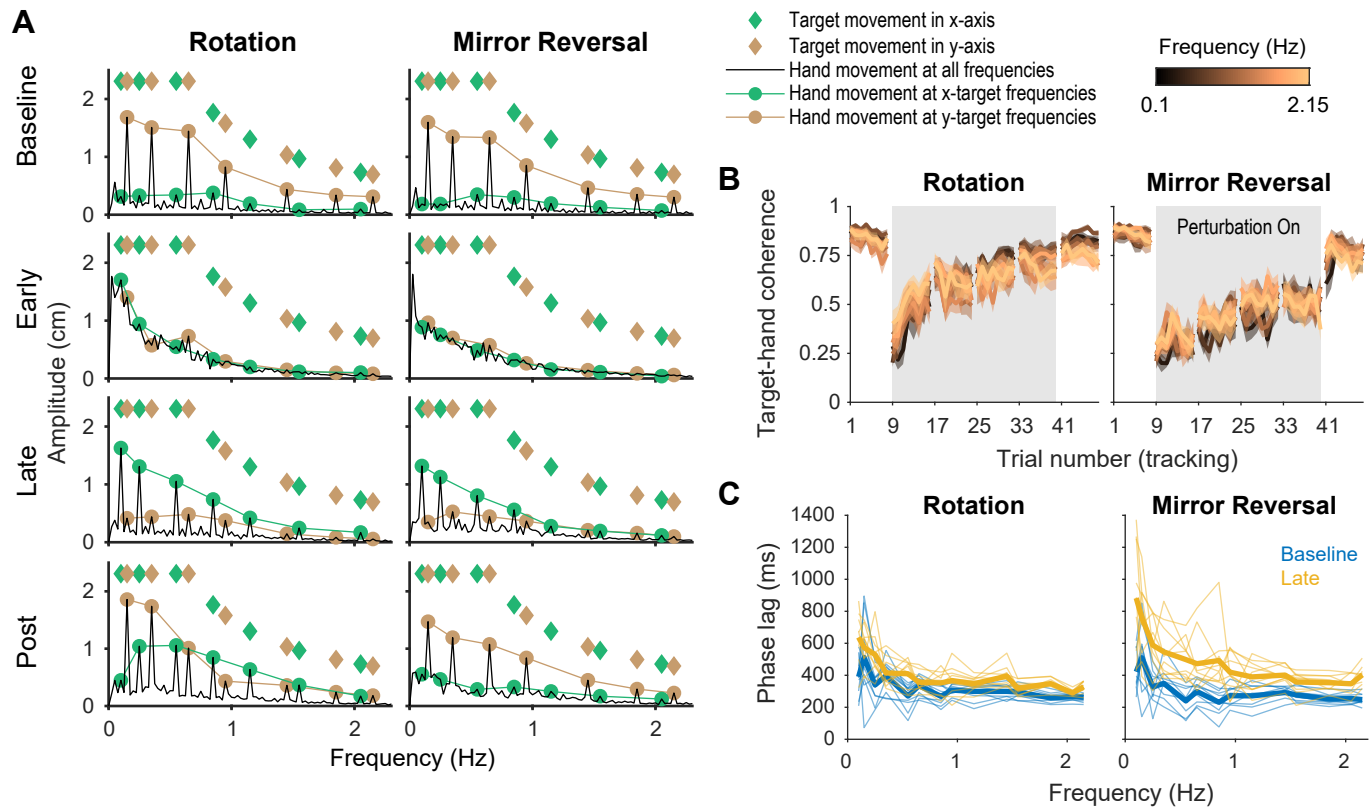

Supplement: supp [file elife-62578-supp-v1.zip]

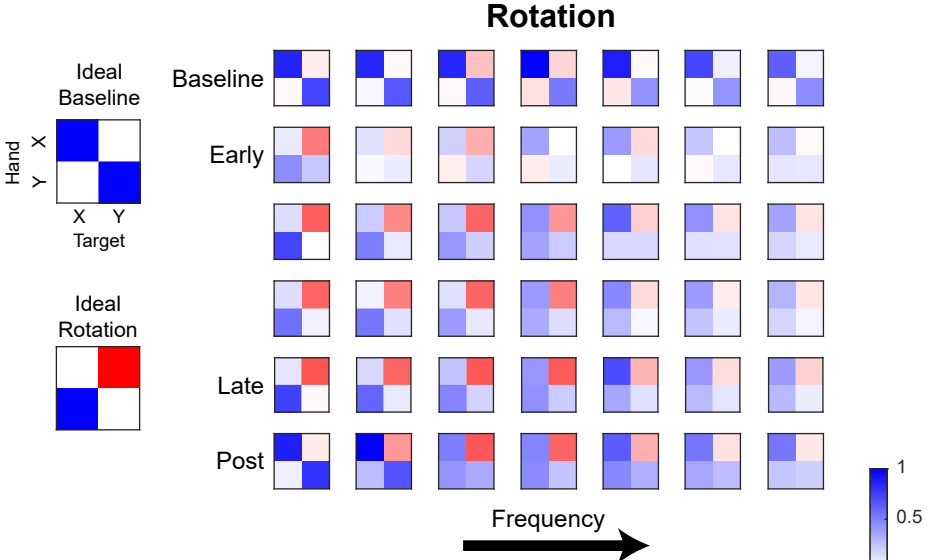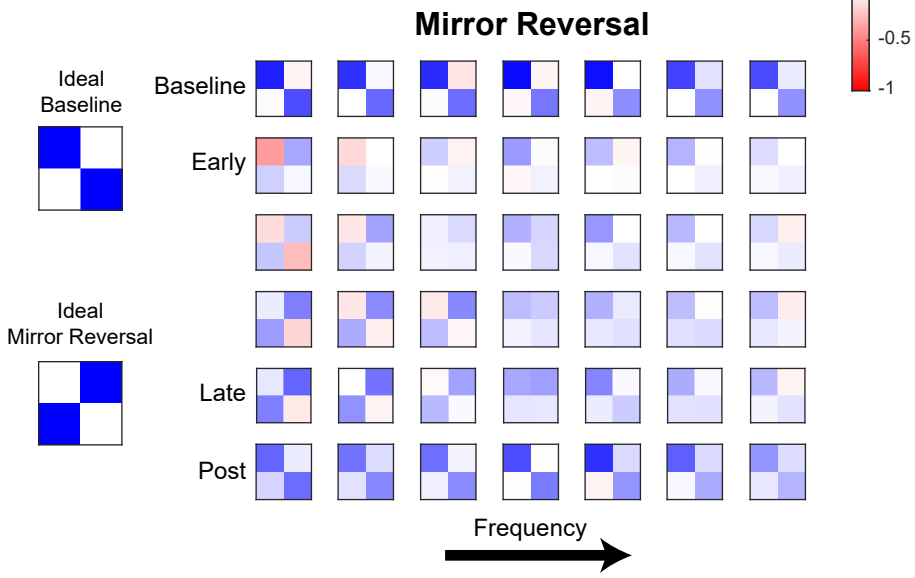

Supplement: supp [file elife-62578-supp-v1.zip]

**A**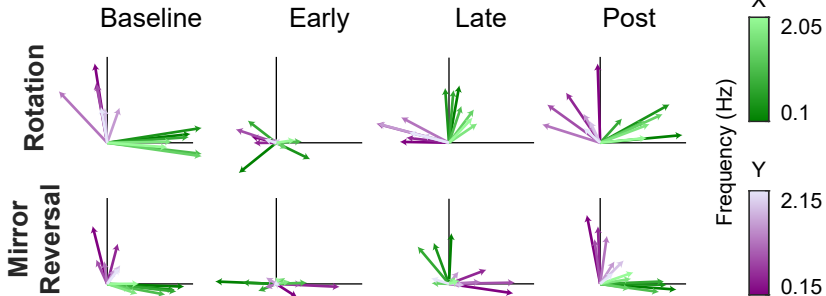**C**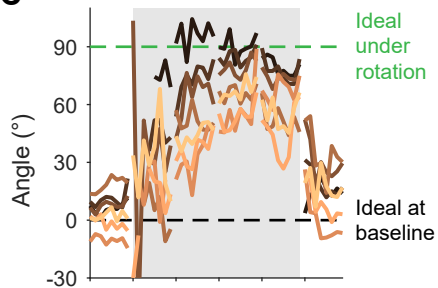**B**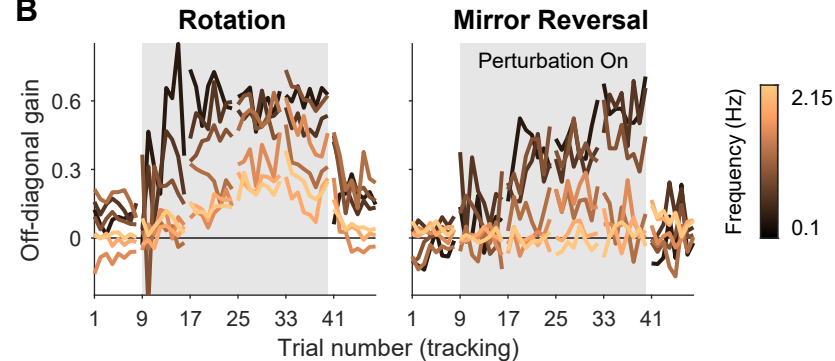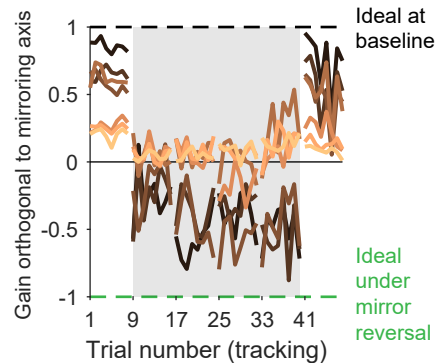

Supplement: supp [file elife-62578-supp-v1.zip › elife_poa_e62578_Figure_5_figure_supplement_2.pdf]

**A**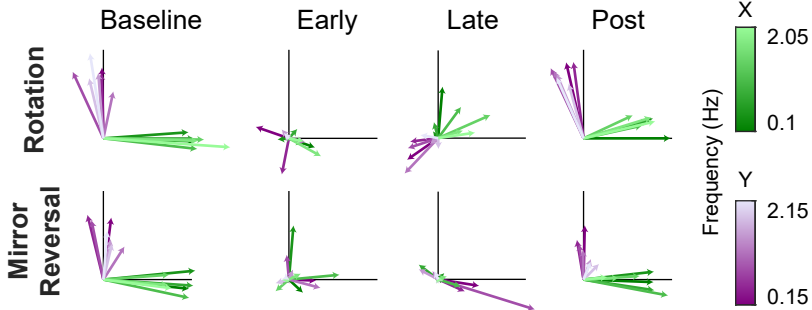**B**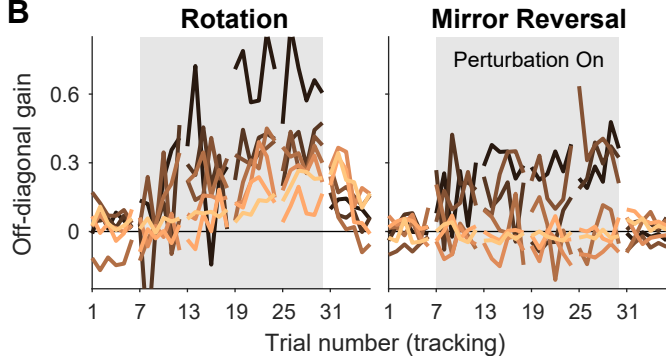**C**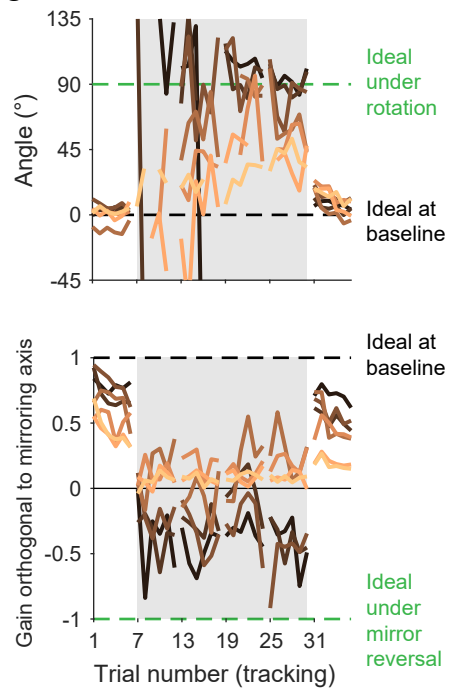

Supplement: supp [file elife-62578-supp-v1.zip › elife_poa_e62578_Figure_6_figure_supplement_1.pdf]
